# Supplementary material for: Lewis vs. Brønsted-basicities of diiron dithiolates: spectroscopic detection of the “rotated structure” and remarkable effects of ethane- vs. propanedithiolate
Source: Royal Society of Chemistry journal article supplement (doi:10.1039/b700754j), 2007-01-01
Supplement: b700754j.pdf [file b700754j.pdf]

### Supplementary Information

“Divergent Lewis- and Bronsted-Basicities of Diiron Dithiolates:  
Remarkable Effects of Ethane- vs. Propanedithiolate”

Aaron K. Justice, Giuseppe Zampella, Luca De Gioia, Thomas B. Rauchfuss

#### I. Preparative Methods.

#### II. Spectroscopic Data.

#### III. Computational details.

#### IV. Crystallography (CIF file is separate).

#### I. Preparative Work

**General:** Unless otherwise indicated, reactions were conducted using Schlenk techniques at room temperature. Chemicals were purchased from Aldrich, and solvents were either HPLC-grade from an alumina filtration system or distilled under nitrogen over an appropriate drying agent. NMR spectra were recorded at room temperature on a Varian Mercury 500 MHz spectrometer. NMR chemical shifts are quoted in ppm ( $\delta$  scale); spectra are referenced to TMS for  $^1\text{H}$ ,  $^{13}\text{C}\{^1\text{H}\}$  and 85%  $\text{H}_3\text{PO}_4$  for  $^{31}\text{P}\{^1\text{H}\}$ . FT-IR spectra were recorded on a Mattson Infinity Gold FTIR spectrometer.  $\text{AlBr}_3$  (Aldrich) and  $\text{B}(\text{C}_6\text{F}_5)_3$  (Strem) were used as received but handled in a glovebox.  $\text{CD}_2\text{Cl}_2$  was dried over  $\text{P}_2\text{O}_5$ , distilled onto  $\text{CaH}_2$ , and then redistilled.

**$\text{Fe}_2(\text{S}_2\text{C}_2\text{H}_4)(\text{CO})_2(\text{dppv})_2$ , **1**.** A solution of 0.50 g (0.702 mmol) of  $\mathbf{1}(\text{CO})_4$  in 50 mL toluene was treated with 0.28 g (0.702 mmol) of dppv in 10 mL toluene. The mixture was photolyzed with a 100 W UV immersion lamp,  $\lambda_{\text{max}} = 356$  nm (Spectroline), until the conversion was complete (~12 h) as indicated by IR spectroscopy. The solvent was

removed in vacuum, and product was extracted into 10 mL of CH<sub>2</sub>Cl<sub>2</sub>. The product precipitated as an olive-green powder upon the addition of 50 mL of hexanes. Crystals were grown by slow diffusion of hexanes into a CH<sub>2</sub>Cl<sub>2</sub> solution. Yield: 0.56 g (76%). <sup>1</sup>H NMR (CD<sub>2</sub>Cl<sub>2</sub>): δ 8.1 – 7.2 (m, 40H, P(C<sub>6</sub>H<sub>5</sub>)<sub>2</sub>), 4.3 (s, 2H, P(CH)<sub>2</sub>P), 1.2 (s, 4H, S(CH<sub>2</sub>)<sub>2</sub>S). <sup>31</sup>P NMR (CD<sub>2</sub>Cl<sub>2</sub>): δ 93.2 at 20 °C; 95.8 (J<sub>P-P</sub> = 21 Hz), 92.2 (J<sub>P-P</sub> = 22 Hz) at -60 °C. IR (CH<sub>2</sub>Cl<sub>2</sub>): ν<sub>CO</sub> = 1888, 1868 cm<sup>-1</sup>. FD-MS: m/z = 1052.2 ([Fe<sub>2</sub>(S<sub>2</sub>C<sub>2</sub>H<sub>4</sub>)(CO)<sub>2</sub>(dppv)<sub>2</sub>]). Anal. Calcd for C<sub>56</sub>H<sub>48</sub>Fe<sub>2</sub>O<sub>2</sub>P<sub>4</sub>S<sub>2</sub> (found): C, 63.87 (63.48); H, 4.60 (4.54).

Fe<sub>2</sub>(S<sub>2</sub>C<sub>3</sub>H<sub>6</sub>)(CO)<sub>2</sub>(dppv)<sub>2</sub>, **2** was prepared similarly. Yield: 0.52 g (72%). <sup>1</sup>H NMR (CD<sub>2</sub>Cl<sub>2</sub>): δ 8.0 – 7.3 (m, 40H, P(C<sub>6</sub>H<sub>5</sub>)<sub>2</sub>), 4.3 (s, 2H, P(CH)<sub>2</sub>P), 1.2 (s, 4H, SCH<sub>2</sub>CH<sub>2</sub>), 0.9 (m, 2H, SCH<sub>2</sub>CH<sub>2</sub>). <sup>31</sup>P NMR (CD<sub>2</sub>Cl<sub>2</sub>): δ 90.8, 79.8 at 20 °C, 97.0, 88.5, 80.9 at -80 °C. IR (CH<sub>2</sub>Cl<sub>2</sub>): ν<sub>CO</sub> = 1888, 1868 cm<sup>-1</sup>. FD-MS: m/z = 1066.6 ([Fe<sub>2</sub>(S<sub>2</sub>C<sub>3</sub>H<sub>6</sub>)(CO)<sub>2</sub>(dppv)<sub>2</sub>]). Anal. Calcd for C<sub>57</sub>H<sub>50</sub>Fe<sub>2</sub>O<sub>2</sub>P<sub>4</sub>S<sub>2</sub> (found): C, 64.18 (63.42); H, 4.72 (4.65).

**Reaction of 1 with AlBr<sub>3</sub>.** A J-Young NMR tube was charged with 15.0 mg (0.0142 mmol) of **1** and 4.0 mg (0.0142 mmol) of AlBr<sub>3</sub>. The tube was evacuated and cooled to 78K to allow ~2 mL of CD<sub>2</sub>Cl<sub>2</sub> to be distilled onto the mixture. The solution was allowed to warm up in a -40 °C bath. NMR data was then collected at -20 °C. <sup>31</sup>P NMR (CD<sub>2</sub>Cl<sub>2</sub>, -20 °C): δ 91.7, 91.2, 90.6, 83.0.

**Reaction of 2 with AlBr<sub>3</sub>.** A J-Young NMR tube was charged with 15.0 mg (0.0141 mmol) of **2** and 4.0 mg (0.0142 mmol) of AlBr<sub>3</sub>. The tube was evacuated and cooled to 78K to allow ~2 mL of CD<sub>2</sub>Cl<sub>2</sub> to be distilled onto the mixture. The solution

was allowed to warm up in a -40 °C bath. NMR data was then collected at -20 °C.  $^{31}\text{P}$  NMR ( $\text{CD}_2\text{Cl}_2$ , -20 °C):  $\delta$  100.4, 92.3, 86.7, 69.3.

**Reactions of 1 with  $\text{B}(\text{C}_6\text{F}_5)_3$ .** A J-Young NMR tube was charged with 6.0 mg (0.0057 mmol) of **1** and 3.0 mg (0.0057 mmol) of  $\text{B}(\text{C}_6\text{F}_5)_3$ . The tube was evacuated and cooled to 78K to allow ~1 mL of  $\text{CD}_2\text{Cl}_2$  to be distilled onto the mixture. The solution was allowed to warm up in a -40 °C bath. NMR data was then collected at -20 °C.

**Reaction of 2 with  $\text{B}(\text{C}_6\text{F}_5)_3$ .** A J-Young NMR tube was charged with 6.0 mg (0.0056 mmol) of **2** and 3.0 mg (0.0057 mmol) of  $\text{B}(\text{C}_6\text{F}_5)_3$ . The tube was evacuated and cooled to 78K to allow ~1 mL of  $\text{CD}_2\text{Cl}_2$  to be distilled onto the mixture. The solution was allowed to warm up in a -40 °C bath. NMR data was then collected at -20 °C.

**Reaction of 1 and 2 with  $\text{H}(\text{OEt}_2)_2\text{BAr}^{\text{F}}_4$ .** A J-Young NMR tube was charged with 8.0 mg (0.0076 mmol) of **1** and 8.0 mg (0.0075 mmol) of **2**. The tube was evacuated and cooled to 78K to allow ~1 mL of  $\text{CD}_2\text{Cl}_2$  to be distilled onto the mixture. The solution was allowed to warm to room temperature and the contents dissolved. The mixture was then cooled to 78K and 7.6 mg (0.0075 mmol) of solid  $\text{H}(\text{OEt}_2)_2\text{BAr}^{\text{F}}_4$  placed on top of the frozen solution. The J-Young tube was evacuated and allowed to warm to room temperature. The  $^1\text{H}$  NMR and  $^{31}\text{P}$  NMR spectrum obtained after 30 min and 24 h were identical, indicating a mixture of unreacted **1**, **2** and  $1\text{H}^+$ ,  $2\text{H}^+$ .

$^{31}\text{P}$  NMR at t = 30 min:  $\delta$  93.1, 90.8 (**1** and **2**), 90.5, 90.4 ( $[\text{Fe}_2(\text{S}_2\text{C}_2\text{H}_4)(\mu\text{-H})(\text{CO})_2(\text{dppv})_2]^+$ ,  $1\text{H}^+$ ): 88.9, 87.9, 84.3, 82.7, 76.8 ( $[\text{Fe}_2(\text{S}_2\text{C}_3\text{H}_6)(\text{m-H})(\text{CO})_2(\text{dppv})_2]^+$ ,  $2\text{H}^+$ ).

**Competition between 1 and 2 for  $\text{AlBr}_3$ .** Treatment of 10 equiv of **1**, 1 equiv of **2**, with 2 equiv  $\text{AlBr}_3$  resulted in quantitative conversion of **2**:

Supplementary Material (ESI) for Chemical Communications  
This journal is (c) The Royal Society of Chemistry 2007

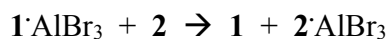

$K_{\text{eq}}$  was calculated with the following assumptions:

1)  $[\mathbf{2} \cdot \text{AlBr}_3] = 0.95$  (we conservatively assume that we cannot detect 5% of the original 1 equiv).

2)  $[\mathbf{1}] = 8.95$  (1 equiv of a original 10 was consumed by  $\text{AlBr}_3$ , plus the 0.05 equiv left that did not react fully with  $\mathbf{2}$ )

3)  $[\mathbf{2}] = 0.05$  (we can detect 95% conversion of this one equivalent)

4)  $[\mathbf{1} \cdot \text{AlBr}_3] = 1.05$ , see #2

$$K = \frac{[\mathbf{2} \cdot \text{AlBr}_3][\mathbf{1}]}{[\mathbf{2}][\mathbf{1} \cdot \text{AlBr}_3]} = \frac{(0.95)(8.95)}{(0.05)(1.05)} = 162$$

Check #1  $[\mathbf{2} \cdot \text{AlBr}_3] + [\mathbf{2}] = 1$  (we started with 1 equiv  $\mathbf{2}$ )

Check #2  $[\mathbf{1}] + [\mathbf{1} \cdot \text{AlBr}_3] = 10$  (we started with 10 equiv  $\mathbf{1}$ )

Check #3  $[\mathbf{2} \cdot \text{AlBr}_3] + [\mathbf{1} \cdot \text{AlBr}_3] = 2$  (we started with 2 equiv  $\text{AlBr}_3$ )

$$\Delta G = -RT \ln K = -(8.3 \text{ J/deg})(253) \ln(162)$$

$$\Delta G > -10.9$$

## II. Selected Spectra

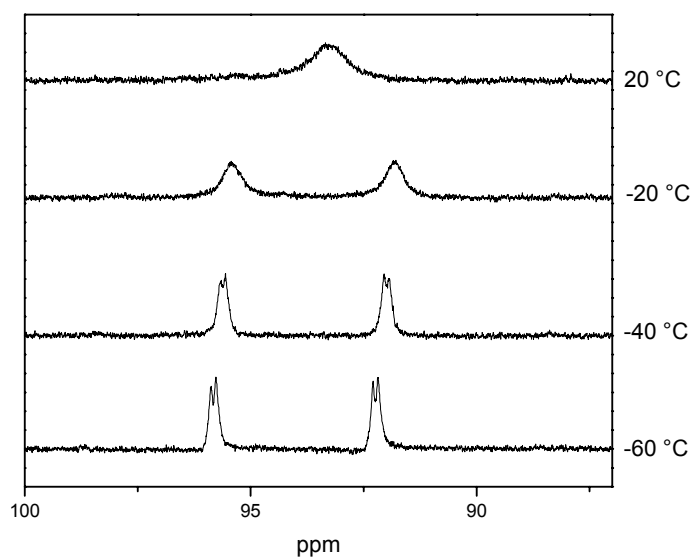

**Figure 1S.** 202 MHz  $^{31}\text{P}$  NMR spectrum of  $\text{Fe}_2(\text{S}_2\text{C}_2\text{H}_4)(\text{CO})_2(\text{dppv})_2$  ( $\text{CD}_2\text{Cl}_2$ ) recorded at various temperatures.

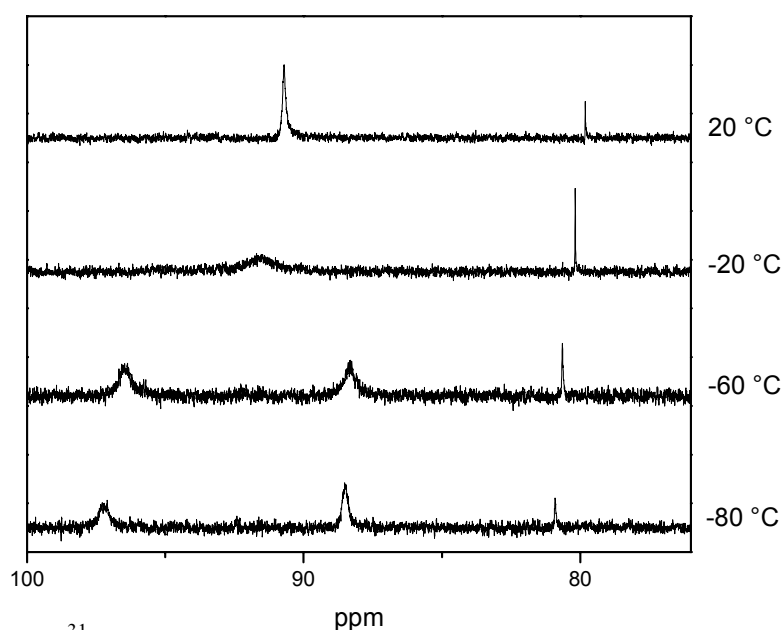

**Figure 2S.** 202 MHz  $^{31}\text{P}$  NMR spectrum of  $\text{Fe}_2(\text{S}_2\text{C}_3\text{H}_6)(\text{CO})_2(\text{dppv})_2$  ( $\text{CD}_2\text{Cl}_2$ ) recorded at various temperatures.

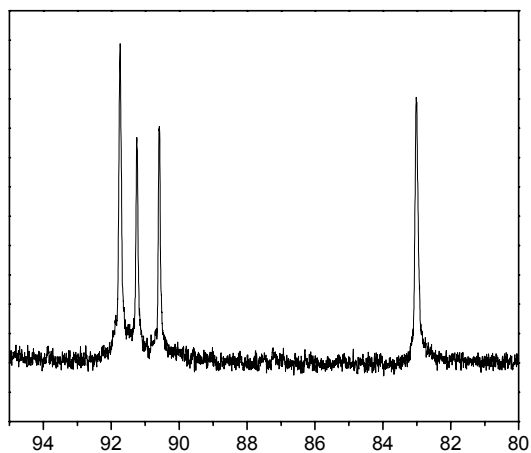

**Figure 3S.** 202 MHz <sup>31</sup>P NMR spectrum of a 1:1 mixture of AlBr<sub>3</sub> + Fe<sub>2</sub>(S<sub>2</sub>C<sub>2</sub>H<sub>4</sub>)(CO)<sub>2</sub>(dppv)<sub>2</sub> (CD<sub>2</sub>Cl<sub>2</sub>) at -20 °C.

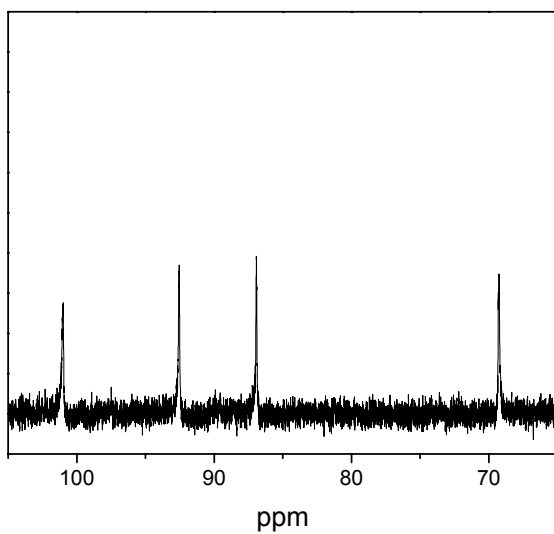

**Figure 4S.** 202 MHz <sup>31</sup>P NMR spectrum of a 1:1 mixture of AlBr<sub>3</sub> + Fe<sub>2</sub>(S<sub>2</sub>C<sub>3</sub>H<sub>6</sub>)(CO)<sub>2</sub>(dppv)<sub>2</sub> (CD<sub>2</sub>Cl<sub>2</sub>) at -20 °C.

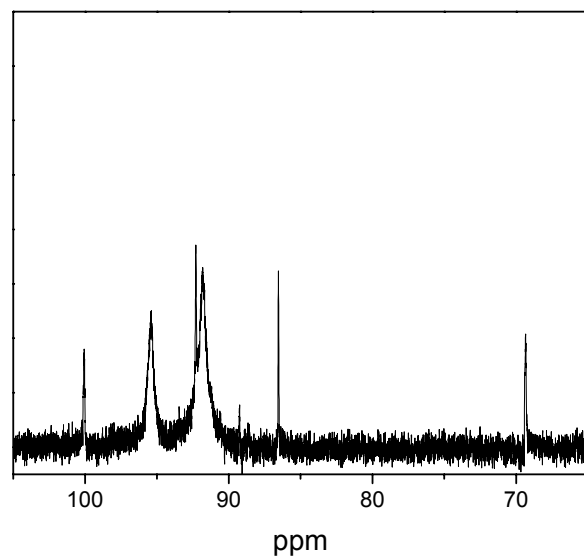

**Figure 5S.** 202 MHz <sup>31</sup>P NMR spectrum of a 1:1 mixture of  $\text{Fe}_2(\text{S}_2\text{C}_2\text{H}_4)(\text{CO})_2(\text{dppv})_2$  +  $\text{Fe}_2(\text{S}_2\text{C}_3\text{H}_6)(\text{CO})_2(\text{dppv})_2$  with 1 equiv. of  $\text{B}(\text{C}_6\text{F}_5)_3$  at  $-20^\circ\text{C}$ .

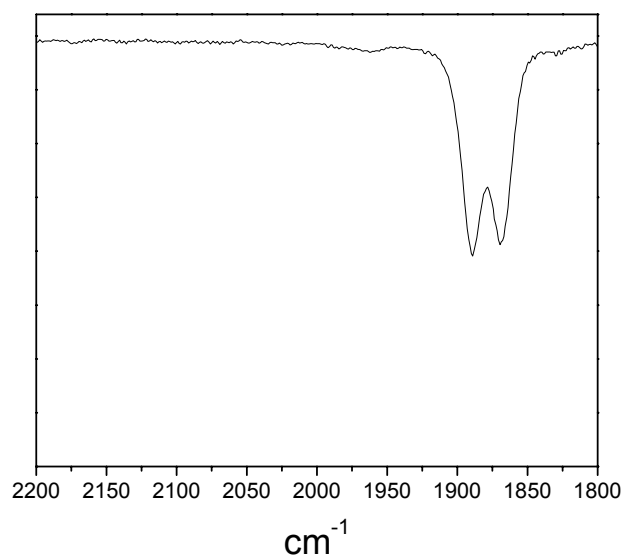

**Figure 6S.** IR spectrum of  $\text{Fe}_2(\text{S}_2\text{C}_3\text{H}_6)(\text{CO})_2(\text{dppv})_2$  in  $\text{CH}_2\text{Cl}_2$ .

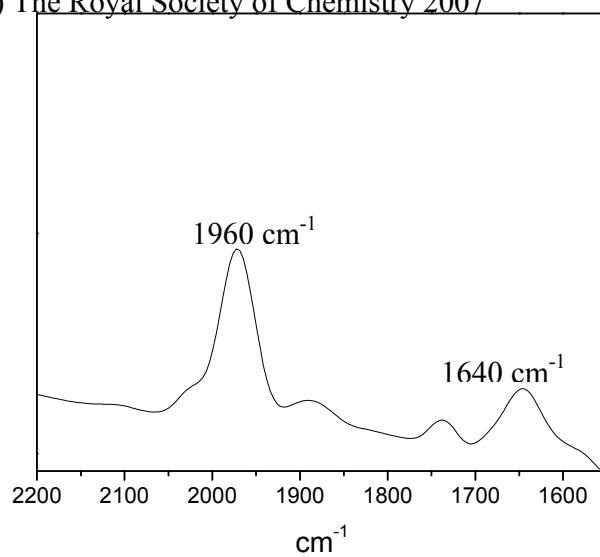

**Figure 7S.** IR spectrum of  $\text{Fe}_2(\text{S}_2\text{C}_2\text{H}_4)(\text{CO})_2(\text{dppv})_2$  and  $\text{AlBr}_3$  in  $\text{CH}_2\text{Cl}_2$  at  $-30 \text{ }^\circ\text{C}$ .



### III. Computational work

DFT calculations were carried out using the pure B-P86 functional [A. D. Becke, *Phys. Rev. A* **1988**, 38, 3098; J. P. Perdew, *Phys. Rev. B* **1986**, 33, 8822] along with a valence triple- $\zeta$  basis set plus polarization functions on all atoms [A. Schafer, C. Huber, R. Ahlrichs, *J. Chem. Phys.* **1994**, 100, 5829]. Stationary points of the energy hypersurface were located using energy gradient techniques and full vibrational analysis has been carried out to further characterize each stationary point.

1. *Prototypical input parameters (i.e. "control" file) used for RI-DFT energy minimization calculations (for keyword meaning, please refer to any TURBOMOLE manual which is freely available on-line; only the bottom line is explicitly described since it concerns the energy convergence criterion)*
- 2.

#### *CONTROL file*

```
$title
$operating system unix
$symmetry c1
$coord file=coord
$user-defined bonds file=coord
$atoms
fe 1,20
  basis =fe def-TZVP
  jbas =fe def-TZVP
p 2,8,21,25
  basis =p def-TZVP
  jbas =p def-TZVP
h 3-5,9-11,14-15,17-18,22-24,26-28
  basis =h def-TZVP
  jbas =h def-TZVP
c 6,13,16,29
  basis =c def-TZVP
  jbas =c def-TZVP
o 7,30
  basis =o def-TZVP
  jbas =o def-TZVP
s 12,19
  basis =s def-TZVP
  jbas =s def-TZVP
```

```
al 31
  basis =al def-TZVP
  jbas  =al def-TZVP
br 32-34
  basis =br def-TZVP
  jbas  =br def-TZVP
$pople AO
$basis  file=basis
$rundimensions
  dim(fock,dens)=161136
  natoms=34
  nshell=256
  nbf(CAO)=566
  nbf(AO)=538
  dim(trafo[SAO<-->AO/CAO])=622
  rhfshells=1
$scfmo  file=mos
$closed shells
a  1-159                ( 2 )
$scfiterlimit  3000
$thize  0.10000000E-04
$thime  5
$scfintunit
  unit=30  size=0  file=twoint
$scfdiis  start=0.5
$drvopt
  cartesian on
  basis    off
  global   off
  hessian  on
  dipole   on
  nuclear polarizability
$interconversion off
  qconv=1.d-7
  maxiter=25
$optimize
  internal off
  cartesian on
  global   off
  basis    off logarithm
$coordinateupdate
  dqmax=0.3
  interpolate on
  statistics 5
$forceupdate
  ahlrichs numgeo=142  mingeo=3  maxgeo=4  modus=<g|dq>  dynamic fail=0.3
```

Supplementary Material (ESI) for Chemical Communications  
This journal is (c) The Royal Society of Chemistry 2007

```
threig=0.005 reseig=0.005 thrbig=3.0 scale=1.00 damping=0.0
$forceinit off
diag=default
$energy file=energy
$grad file=gradient
$forceapprox file=forceapprox
$lock off
$dft
functional b-p
gridsize m3
$scfdamp start=1.000 step=0.050 min=0.050
$ricore 70
$ridft
$jbas file=auxbasis
$scforbitalshift closedshell=0.4
$scfconv 6 (it means that SCF convergence criterion will be 10-6 for the energy.
Gradient are evaluated only if the integer in $scfconv is > 6)
```

2. *Coordinates (XYZ) of the optimized structures (stationary point of the PES, subsequently characterized as minima) discussed throughout the paper.*

Fe<sub>2</sub>(S<sub>2</sub>C<sub>2</sub>H<sub>4</sub>)(PH<sub>3</sub>)<sub>4</sub>(CO)(COAlBr<sub>3</sub>), C<sub>2</sub> isomer

|    |           |            |           |
|----|-----------|------------|-----------|
| Fe | 2.3696026 | -0.9736454 | 5.1077132 |
| P  | 4.4774859 | -1.1021984 | 5.6811228 |
| H  | 5.2238358 | -2.3129245 | 5.4849079 |
| H  | 4.9064458 | -0.8857876 | 7.0356450 |
| H  | 5.4541164 | -0.2345092 | 5.0867321 |
| C  | 2.6486488 | -1.1305777 | 3.3854557 |
| O  | 2.8272155 | -1.2194496 | 2.2310896 |
| P  | 2.1969703 | 1.2155506  | 4.8908955 |
| H  | 3.3633141 | 2.0544842  | 4.8302371 |
| H  | 1.4970190 | 1.9705587  | 5.8850265 |
| H  | 1.5491304 | 1.7716788  | 3.7438503 |
| S  | 1.3149971 | -0.8374118 | 7.1270886 |
| C  | 1.8228351 | -2.3941090 | 8.0203919 |

Supplementary Material (ESI) for Chemical Communications  
This journal is (c) The Royal Society of Chemistry 2007

|    |            |            |           |
|----|------------|------------|-----------|
| H  | 2.7456714  | -2.1491650 | 8.5643043 |
| H  | 1.0416115  | -2.5957937 | 8.7652371 |
| C  | 2.0175526  | -3.5684518 | 7.0666740 |
| H  | 3.0520572  | -3.9377038 | 7.0769397 |
| H  | 1.3612743  | -4.4136056 | 7.3152497 |
| S  | 1.6508985  | -3.1068321 | 5.2959834 |
| Fe | -0.0603916 | -1.5748993 | 5.4744330 |
| P  | -1.5704988 | -2.7352556 | 6.6008807 |
| H  | -2.7334305 | -3.2596627 | 5.9518847 |
| H  | -2.2510858 | -2.1276603 | 7.7005680 |
| H  | -1.2078295 | -3.9456497 | 7.2823827 |
| P  | -0.6679242 | -2.1057649 | 3.4114440 |
| H  | 0.1736312  | -2.9711982 | 2.6466331 |
| H  | -1.9101969 | -2.7819254 | 3.1688570 |
| H  | -0.8378352 | -1.0802405 | 2.4328934 |
| C  | -0.9293217 | -0.1283179 | 5.3680134 |
| O  | -1.5596132 | 0.9026895  | 5.2568014 |
| Al | -3.3930959 | 1.5458429  | 5.2799695 |
| Br | -3.5237344 | 2.7258591  | 3.3131628 |
| Br | -3.4991468 | 2.7624645  | 7.2242128 |
| Br | -4.5916945 | -0.4414051 | 5.2983825 |

$\text{Fe}_2(\text{S}_2\text{C}_2\text{H}_4)(\text{PH}_3)_4(\text{CO})(\text{COAlBr}_3)$ ,  $\mu$ -CO isomer

|    |           |            |           |
|----|-----------|------------|-----------|
| C  | 2.6091709 | -1.0927167 | 3.3662791 |
| O  | 2.9656029 | -1.2156245 | 2.2655898 |
| Fe | 2.1130561 | -0.9217995 | 5.0414649 |
| S  | 1.4806643 | -3.1545271 | 5.2728757 |
| C  | 2.0961227 | -3.6224300 | 6.9703515 |
| C  | 2.1046954 | -2.4485409 | 7.9438667 |
| S  | 1.2116827 | -0.9531513 | 7.2759429 |

Supplementary Material (ESI) for Chemical Communications  
This journal is (c) The Royal Society of Chemistry 2007

|    |            |            |           |
|----|------------|------------|-----------|
| Fe | -0.2290019 | -1.6983513 | 5.6768574 |
| P  | -1.6955127 | -2.9750588 | 4.6696397 |
| P  | 4.2311830  | -1.0901902 | 5.7371145 |
| P  | 2.1535033  | 1.3024357  | 5.0505216 |
| C  | 0.1588242  | -0.6848737 | 4.3329453 |
| O  | -0.2168463 | -0.0189796 | 3.3441563 |
| Al | -1.4423756 | 0.9494831  | 2.3251933 |
| Br | -0.8560334 | 0.5428577  | 0.1395508 |
| P  | -1.8219883 | -0.4406805 | 6.5198915 |
| Br | -1.0944548 | 3.1231341  | 3.0697368 |
| Br | -3.5666311 | 0.1651852  | 2.8784428 |
| H  | 4.6675054  | -0.4876865 | 6.9649427 |
| H  | 5.2467426  | -0.5111096 | 4.9121909 |
| H  | 1.1005012  | 1.9822094  | 5.7353160 |
| H  | 3.2487768  | 2.0238134  | 5.6303562 |
| H  | 2.0820079  | 2.0123031  | 3.8160618 |
| H  | 4.8952768  | -2.3470891 | 5.9260177 |
| H  | 3.1289156  | -2.1313197 | 8.1847802 |
| H  | 1.6083724  | -2.7025075 | 8.8903995 |
| H  | 1.4264445  | -4.4231725 | 7.3101141 |
| H  | 3.0992834  | -4.0543538 | 6.8465906 |
| H  | -2.8810225 | -1.0428339 | 7.2822741 |
| H  | -1.4826955 | 0.5692177  | 7.4763500 |
| H  | -2.6547917 | 0.3457325  | 5.6617912 |
| H  | -2.9979816 | -3.2105994 | 5.2260371 |
| H  | -2.1478997 | -2.6482540 | 3.3504845 |
| H  | -1.3599003 | -4.3458439 | 4.4311518 |

$\text{Fe}_2(\text{S}_2\text{C}_2\text{H}_4)(\text{CO})_2(\text{dppv})_2$  (**1**)

|   |          |           |          |
|---|----------|-----------|----------|
| C | 4.065879 | -0.568241 | 2.192765 |
|---|----------|-----------|----------|

Supplementary Material (ESI) for Chemical Communications  
This journal is (c) The Royal Society of Chemistry 2007

|    |           |           |           |
|----|-----------|-----------|-----------|
| C  | 4.720728  | 0.024211  | 1.098793  |
| C  | 6.101616  | -0.172497 | 0.945850  |
| C  | 6.808326  | -0.964059 | 1.856163  |
| C  | 6.146697  | -1.568587 | 2.929566  |
| C  | 4.773823  | -1.363118 | 3.098341  |
| P  | 3.716915  | 1.058983  | -0.093511 |
| C  | 2.228083  | -0.052025 | -0.247267 |
| C  | 1.025208  | 0.523145  | -0.341839 |
| P  | 0.961859  | 2.378954  | -0.261282 |
| C  | -0.596356 | 2.624220  | 0.738271  |
| C  | -1.778525 | 1.926175  | 0.431051  |
| C  | -2.927407 | 2.099763  | 1.205594  |
| C  | -2.911656 | 2.978917  | 2.294541  |
| C  | -1.744012 | 3.680975  | 2.601939  |
| C  | -0.589388 | 3.502036  | 1.830939  |
| Fe | 2.929952  | 3.095287  | 0.436478  |
| C  | 2.752810  | 2.621628  | 2.108400  |
| O  | 2.624699  | 2.340163  | 3.242525  |
| Fe | 4.731130  | 4.965957  | 0.671601  |
| S  | 2.499920  | 5.269786  | 0.987042  |
| C  | 1.845374  | 5.950843  | -0.628023 |
| C  | 2.671686  | 5.473353  | -1.811020 |
| S  | 3.919292  | 4.174868  | -1.306346 |
| P  | 5.323765  | 5.485355  | 2.760413  |
| C  | 6.720660  | 6.710321  | 2.609252  |
| C  | 6.926219  | 7.276529  | 1.414229  |
| P  | 5.726707  | 6.835647  | 0.063178  |
| C  | 4.893318  | 8.512290  | -0.086011 |
| C  | 5.475513  | 9.592365  | -0.772364 |
| C  | 4.861353  | 10.848322 | -0.767412 |
| C  | 3.662851  | 11.044021 | -0.072781 |

Supplementary Material (ESI) for Chemical Communications  
This journal is (c) The Royal Society of Chemistry 2007

|   |           |           |           |
|---|-----------|-----------|-----------|
| C | 3.083598  | 9.977759  | 0.621243  |
| C | 3.694751  | 8.719814  | 0.614060  |
| C | 6.066600  | 4.269385  | 3.969085  |
| C | 6.093571  | 2.902035  | 3.674367  |
| C | 6.645200  | 1.995082  | 4.586396  |
| C | 7.176190  | 2.448561  | 5.795653  |
| C | 7.149236  | 3.815052  | 6.099169  |
| C | 6.593290  | 4.719753  | 5.193384  |
| C | 4.161491  | 6.392251  | 3.904900  |
| C | 3.197904  | 5.653148  | 4.612645  |
| C | 2.297290  | 6.300772  | 5.460931  |
| C | 2.344658  | 7.690994  | 5.613329  |
| C | 3.297096  | 8.431521  | 4.908761  |
| C | 4.199348  | 7.786792  | 4.054686  |
| C | 6.181186  | 4.011272  | 0.525794  |
| O | 7.169447  | 3.381665  | 0.413221  |
| C | 6.798560  | 6.795805  | -1.454082 |
| C | 6.250933  | 7.072801  | -2.718661 |
| C | 7.026516  | 6.950886  | -3.873269 |
| C | 8.360534  | 6.539003  | -3.783299 |
| C | 8.909983  | 6.246059  | -2.531983 |
| C | 8.134188  | 6.369064  | -1.374376 |
| C | 0.360763  | 2.772523  | -1.991931 |
| C | -0.731545 | 3.621066  | -2.236553 |
| C | -1.080673 | 3.971109  | -3.545815 |
| C | -0.347678 | 3.475077  | -4.627464 |
| C | 0.742174  | 2.628869  | -4.392460 |
| C | 1.098391  | 2.286331  | -3.086291 |
| C | 4.583628  | 0.697204  | -1.714534 |
| C | 4.117174  | -0.293457 | -2.596204 |
| C | 4.778217  | -0.546443 | -3.801884 |

Supplementary Material (ESI) for Chemical Communications  
This journal is (c) The Royal Society of Chemistry 2007

|   |           |           |           |
|---|-----------|-----------|-----------|
| C | 5.917883  | 0.185121  | -4.145560 |
| C | 6.389401  | 1.172516  | -3.276853 |
| C | 5.725472  | 1.432161  | -2.074510 |
| H | 0.322741  | 4.051112  | 2.070740  |
| H | -1.725031 | 4.369772  | 3.448610  |
| H | -3.809762 | 3.115012  | 2.899997  |
| H | -3.836994 | 1.548875  | 0.957772  |
| H | -1.810959 | 1.253040  | -0.427913 |
| H | 1.966065  | 1.645336  | -2.919504 |
| H | 1.324896  | 2.238765  | -5.228920 |
| H | -0.621911 | 3.746941  | -5.648328 |
| H | -1.932065 | 4.632452  | -3.718108 |
| H | -1.320806 | 4.005664  | -1.402640 |
| H | 0.107846  | -0.061260 | -0.456832 |
| H | 2.357183  | -1.138683 | -0.263817 |
| H | 6.105583  | 2.213700  | -1.419076 |
| H | 7.273768  | 1.757232  | -3.535751 |
| H | 6.434287  | -0.011816 | -5.086951 |
| H | 4.399154  | -1.320952 | -4.471761 |
| H | 3.228075  | -0.875676 | -2.352099 |
| H | 2.995840  | -0.412500 | 2.340083  |
| H | 4.248768  | -1.821346 | 3.938434  |
| H | 6.698759  | -2.195436 | 3.632249  |
| H | 7.881084  | -1.111999 | 1.719049  |
| H | 6.631406  | 0.280405  | 0.107948  |
| H | 2.048429  | 5.016691  | -2.591446 |
| H | 3.245890  | 6.292576  | -2.263156 |
| H | 0.802296  | 5.615300  | -0.697355 |
| H | 1.848790  | 7.045753  | -0.539907 |
| H | 6.552664  | 5.779949  | 5.452334  |
| H | 7.554830  | 4.175947  | 7.046416  |



Supplementary Material (ESI) for Chemical Communications  
This journal is (c) The Royal Society of Chemistry 2007

|   |          |           |           |
|---|----------|-----------|-----------|
| H | 7.604987 | 1.739534  | 6.506447  |
| H | 6.650475 | 0.931502  | 4.344244  |
| H | 5.670497 | 2.544337  | 2.735414  |
| H | 3.156514 | 4.567345  | 4.508944  |
| H | 1.556534 | 5.714614  | 6.007812  |
| H | 1.642688 | 8.194287  | 6.280638  |
| H | 3.344929 | 9.516194  | 5.023704  |
| H | 4.938003 | 8.375498  | 3.508389  |
| H | 7.336931 | 6.949885  | 3.481137  |
| H | 7.710086 | 8.020583  | 1.241294  |
| H | 6.410484 | 9.453107  | -1.317211 |
| H | 5.323911 | 11.677873 | -1.306043 |
| H | 3.184811 | 12.025531 | -0.069866 |
| H | 2.152179 | 10.121592 | 1.171846  |
| H | 3.248103 | 7.890882  | 1.167738  |
| H | 8.570812 | 6.119601  | -0.405587 |
| H | 9.947845 | 5.917072  | -2.453271 |
| H | 8.966949 | 6.443672  | -4.685727 |
| H | 6.586272 | 7.175909  | -4.846489 |
| H | 5.213485 | 7.401666  | -2.803832 |

$\text{Fe}_2(\text{S}_2\text{C}_3\text{H}_6)(\text{CO})_2(\text{dppv})_2$  (**2**)

|   |          |           |           |
|---|----------|-----------|-----------|
| C | 4.093252 | -0.527702 | 2.219760  |
| C | 4.743272 | 0.049433  | 1.114494  |
| C | 6.120750 | -0.164246 | 0.950735  |
| C | 6.827884 | -0.956741 | 1.859932  |
| C | 6.170174 | -1.545870 | 2.944310  |
| C | 4.801321 | -1.323996 | 3.124148  |
| P | 3.729554 | 1.069716  | -0.086013 |

Supplementary Material (ESI) for Chemical Communications  
This journal is (c) The Royal Society of Chemistry 2007

|    |           |           |           |
|----|-----------|-----------|-----------|
| C  | 2.252042  | -0.059269 | -0.209346 |
| C  | 1.041079  | 0.498767  | -0.300432 |
| P  | 0.950027  | 2.355074  | -0.268945 |
| C  | -0.603193 | 2.597663  | 0.741376  |
| C  | -1.786054 | 1.897898  | 0.439863  |
| C  | -2.928384 | 2.063193  | 1.225598  |
| C  | -2.905455 | 2.934180  | 2.320921  |
| C  | -1.737291 | 3.637497  | 2.622346  |
| C  | -0.589304 | 3.468279  | 1.839546  |
| Fe | 2.911774  | 3.122634  | 0.408403  |
| C  | 2.727509  | 2.642530  | 2.079291  |
| O  | 2.594767  | 2.352269  | 3.210920  |
| Fe | 4.685857  | 5.037035  | 0.634863  |
| S  | 2.446363  | 5.282956  | 1.022789  |
| C  | 1.517921  | 6.167825  | -0.336823 |
| C  | 2.309626  | 6.476626  | -1.596528 |
| C  | 2.837445  | 5.251781  | -2.324597 |
| S  | 3.965038  | 4.130832  | -1.350571 |
| P  | 5.268453  | 5.526360  | 2.743805  |
| C  | 6.684005  | 6.730916  | 2.620098  |
| C  | 6.916975  | 7.300976  | 1.432374  |
| P  | 5.719872  | 6.907854  | 0.065161  |
| C  | 4.953636  | 8.622005  | -0.047984 |
| C  | 5.563951  | 9.684999  | -0.734600 |
| C  | 4.996344  | 10.962789 | -0.709959 |
| C  | 3.820358  | 11.197836 | 0.009526  |
| C  | 3.213974  | 10.147662 | 0.705855  |
| C  | 3.775728  | 8.867980  | 0.674673  |
| C  | 5.995773  | 4.287171  | 3.938242  |
| C  | 6.026469  | 2.925544  | 3.620155  |
| C  | 6.574003  | 2.003933  | 4.519839  |

Supplementary Material (ESI) for Chemical Communications  
This journal is (c) The Royal Society of Chemistry 2007

|   |           |           |           |
|---|-----------|-----------|-----------|
| C | 7.096017  | 2.436754  | 5.740175  |
| C | 7.065101  | 3.797675  | 6.067562  |
| C | 6.513745  | 4.717144  | 5.173810  |
| C | 4.113071  | 6.427705  | 3.898054  |
| C | 3.141082  | 5.689987  | 4.595713  |
| C | 2.249521  | 6.336241  | 5.454749  |
| C | 2.312317  | 7.723723  | 5.625421  |
| C | 3.271883  | 8.463163  | 4.929246  |
| C | 4.166711  | 7.819413  | 4.066739  |
| C | 6.138465  | 4.085018  | 0.503657  |
| O | 7.125682  | 3.452986  | 0.398767  |
| C | 6.807436  | 6.862996  | -1.441061 |
| C | 6.276482  | 7.149680  | -2.710689 |
| C | 7.064051  | 7.020642  | -3.856499 |
| C | 8.391934  | 6.591683  | -3.752112 |
| C | 8.924086  | 6.290263  | -2.495659 |
| C | 8.136996  | 6.421554  | -1.346655 |
| C | 0.306628  | 2.669952  | -2.000130 |
| C | -0.754372 | 3.555313  | -2.254520 |
| C | -1.137484 | 3.848011  | -3.568053 |
| C | -0.470118 | 3.258134  | -4.645232 |
| C | 0.588787  | 2.376403  | -4.401020 |
| C | 0.977913  | 2.088942  | -3.090617 |
| C | 4.593964  | 0.690558  | -1.701567 |
| C | 4.104126  | -0.279100 | -2.593179 |
| C | 4.767902  | -0.545849 | -3.794473 |
| C | 5.931277  | 0.154018  | -4.124622 |
| C | 6.423941  | 1.123383  | -3.247452 |
| C | 5.758838  | 1.395937  | -2.048700 |
| H | 3.145129  | 7.143641  | -1.339613 |
| H | 1.660099  | 7.044446  | -2.289135 |

Supplementary Material (ESI) for Chemical Communications  
This journal is (c) The Royal Society of Chemistry 2007

|   |           |           |           |
|---|-----------|-----------|-----------|
| H | 0.322543  | 4.020448  | 2.074774  |
| H | -1.712161 | 4.319204  | 3.474414  |
| H | -3.798784 | 3.062699  | 2.935076  |
| H | -3.838925 | 1.512174  | 0.981998  |
| H | -1.824498 | 1.230345  | -0.423328 |
| H | 1.819686  | 1.416236  | -2.917421 |
| H | 1.120173  | 1.913266  | -5.234246 |
| H | -0.772078 | 3.484072  | -5.669425 |
| H | -1.964590 | 4.537525  | -3.747432 |
| H | -1.294642 | 4.012036  | -1.423670 |
| H | 0.129011  | -0.098380 | -0.390396 |
| H | 2.395700  | -1.144381 | -0.204566 |
| H | 6.155103  | 2.163540  | -1.386330 |
| H | 7.326688  | 1.683594  | -3.497007 |
| H | 6.450595  | -0.054823 | -5.061788 |
| H | 4.373536  | -1.307227 | -4.470428 |
| H | 3.197130  | -0.836943 | -2.356894 |
| H | 3.026556  | -0.360173 | 2.376957  |
| H | 4.278877  | -1.771167 | 3.971810  |
| H | 6.721712  | -2.172031 | 3.648024  |
| H | 7.897618  | -1.117686 | 1.713527  |
| H | 6.647744  | 0.275140  | 0.104065  |
| H | 2.016186  | 4.614555  | -2.679997 |
| H | 3.430540  | 5.553504  | -3.199873 |
| H | 0.635424  | 5.551844  | -0.562797 |
| H | 1.163174  | 7.099415  | 0.127371  |
| H | 6.469223  | 5.772690  | 5.450622  |
| H | 7.463709  | 4.142653  | 7.023707  |
| H | 7.519280  | 1.714619  | 6.441147  |
| H | 6.582722  | 0.944766  | 4.259847  |
| H | 5.608739  | 2.583456  | 2.673102  |

Supplementary Material (ESI) for Chemical Communications  
This journal is (c) The Royal Society of Chemistry 2007

|   |          |           |           |
|---|----------|-----------|-----------|
| H | 3.088310 | 4.606143  | 4.477964  |
| H | 1.503100 | 5.750963  | 5.995116  |
| H | 1.617612 | 8.225811  | 6.301330  |
| H | 3.331705 | 9.545655  | 5.058849  |
| H | 4.913128 | 8.407077  | 3.530048  |
| H | 7.293092 | 6.950866  | 3.502005  |
| H | 7.717070 | 8.031344  | 1.274961  |
| H | 6.482455 | 9.515721  | -1.298254 |
| H | 5.477812 | 11.777793 | -1.254131 |
| H | 3.379090 | 12.196195 | 0.027441  |
| H | 2.298645 | 10.321784 | 1.274570  |
| H | 3.300455 | 8.047017  | 1.216829  |
| H | 8.559449 | 6.164815  | -0.373511 |
| H | 9.956560 | 5.947388  | -2.406261 |
| H | 9.006943 | 6.489155  | -4.647844 |
| H | 6.637957 | 7.252211  | -4.834594 |
| H | 5.242501 | 7.487223  | -2.805420 |

1-AlBr<sub>3</sub> adduct ( $\mu$ -CO isomer)

|   |          |          |          |
|---|----------|----------|----------|
| C | 4.811004 | 6.125373 | 5.655030 |
| C | 4.550765 | 5.178402 | 4.648562 |
| C | 3.771264 | 4.056435 | 4.947279 |
| C | 3.257774 | 3.875215 | 6.235494 |
| C | 3.525041 | 4.813922 | 7.233663 |
| C | 4.303063 | 5.940441 | 6.941780 |
| P | 5.277279 | 5.407908 | 2.951218 |
| C | 4.826365 | 7.194658 | 2.631387 |
| C | 3.533113 | 7.656612 | 2.935677 |
| C | 3.166513 | 8.975010 | 2.652004 |

Supplementary Material (ESI) for Chemical Communications  
This journal is (c) The Royal Society of Chemistry 2007

|    |           |           |           |
|----|-----------|-----------|-----------|
| C  | 4.084253  | 9.851479  | 2.062687  |
| C  | 5.370934  | 9.398750  | 1.755501  |
| C  | 5.739542  | 8.078263  | 2.033174  |
| Fe | 4.954197  | 3.922313  | 1.342065  |
| P  | 7.087919  | 4.313400  | 0.842487  |
| C  | 7.897115  | 5.019165  | 2.356114  |
| C  | 7.088275  | 5.534744  | 3.285083  |
| Fe | 2.961958  | 2.388418  | 0.628137  |
| S  | 2.746264  | 4.515620  | 1.433701  |
| C  | 2.496147  | 5.595477  | -0.070412 |
| C  | 3.194410  | 5.018939  | -1.290775 |
| S  | 4.297302  | 3.572132  | -0.849468 |
| P  | 0.971850  | 2.151755  | -0.351329 |
| C  | 0.767859  | 0.360919  | -0.776635 |
| C  | 1.852203  | -0.417415 | -0.720857 |
| P  | 3.471413  | 0.336925  | -0.213889 |
| C  | 4.133827  | -1.113921 | 0.760456  |
| C  | 5.205439  | -1.899124 | 0.308611  |
| C  | 5.583812  | -3.046406 | 1.011580  |
| C  | 4.899992  | -3.422685 | 2.168731  |
| C  | 3.837065  | -2.641389 | 2.628187  |
| C  | 3.456126  | -1.492866 | 1.931828  |
| C  | -0.600948 | 2.478225  | 0.601423  |
| C  | -1.832766 | 1.981034  | 0.136207  |
| C  | -3.008342 | 2.213237  | 0.852484  |
| C  | -2.971801 | 2.952322  | 2.040124  |
| C  | -1.755664 | 3.458428  | 2.502768  |
| C  | -0.574950 | 3.220314  | 1.790147  |
| C  | 0.557347  | 2.937469  | -1.998934 |
| C  | -0.389539 | 3.968298  | -2.114880 |
| C  | -0.626476 | 4.575645  | -3.352389 |

Supplementary Material (ESI) for Chemical Communications  
This journal is (c) The Royal Society of Chemistry 2007

|    |           |           |           |
|----|-----------|-----------|-----------|
| C  | 0.076894  | 4.161088  | -4.486890 |
| C  | 1.025134  | 3.137834  | -4.377814 |
| C  | 1.268468  | 2.533268  | -3.142414 |
| C  | 2.352170  | 1.712956  | 2.124691  |
| O  | 1.917115  | 1.320397  | 3.137466  |
| C  | 5.182000  | 2.480139  | 2.197999  |
| O  | 5.497725  | 1.507621  | 2.883473  |
| Al | 6.218905  | 0.735874  | 4.455142  |
| Br | 7.483364  | 2.403554  | 5.459124  |
| C  | 4.434966  | 0.213770  | -1.803074 |
| C  | 3.871466  | -0.330501 | -2.968816 |
| C  | 4.617871  | -0.417161 | -4.148652 |
| C  | 5.939384  | 0.033856  | -4.175868 |
| C  | 6.506794  | 0.575774  | -3.019154 |
| C  | 5.761057  | 0.674083  | -1.842037 |
| C  | 8.262664  | 2.937565  | 0.407965  |
| C  | 8.684618  | 2.709747  | -0.912363 |
| C  | 9.574668  | 1.669311  | -1.196821 |
| C  | 10.035816 | 0.835296  | -0.173156 |
| C  | 9.606315  | 1.047315  | 1.139884  |
| C  | 8.725765  | 2.092987  | 1.430194  |
| C  | 7.608483  | 5.632085  | -0.384913 |
| C  | 8.967665  | 5.918632  | -0.608854 |
| C  | 9.339757  | 6.963480  | -1.457718 |
| C  | 8.360582  | 7.732320  | -2.098067 |
| C  | 7.009358  | 7.457640  | -1.874640 |
| C  | 6.638148  | 6.417785  | -1.015293 |
| Br | 4.417809  | 0.050765  | 5.729167  |
| Br | 7.556656  | -1.009733 | 3.738941  |
| H  | 0.370735  | 3.618954  | 2.158770  |
| H  | -1.717677 | 4.037113  | 3.427210  |

Supplementary Material (ESI) for Chemical Communications  
This journal is (c) The Royal Society of Chemistry 2007

|   |           |           |           |
|---|-----------|-----------|-----------|
| H | -3.890738 | 3.132509  | 2.600711  |
| H | -3.955210 | 1.816471  | 0.481784  |
| H | -1.885529 | 1.423283  | -0.800285 |
| H | 2.027383  | 1.752694  | -3.067112 |
| H | 1.583715  | 2.811789  | -5.256825 |
| H | -0.112122 | 4.633346  | -5.452273 |
| H | -1.367858 | 5.373204  | -3.428560 |
| H | -0.954040 | 4.292247  | -1.239491 |
| H | -0.212014 | -0.026874 | -1.067206 |
| H | 1.815236  | -1.488623 | -0.940638 |
| H | 6.221268  | 1.106972  | -0.952131 |
| H | 7.537703  | 0.929170  | -3.025259 |
| H | 6.525498  | -0.036454 | -5.093869 |
| H | 4.165045  | -0.846348 | -5.044485 |
| H | 2.844031  | -0.695518 | -2.963681 |
| H | 2.625919  | -0.898755 | 2.312354  |
| H | 3.309348  | -2.912677 | 3.543421  |
| H | 5.203485  | -4.313653 | 2.720516  |
| H | 6.424933  | -3.642345 | 0.653133  |
| H | 5.746559  | -1.624781 | -0.596507 |
| H | 2.476682  | 4.639567  | -2.026758 |
| H | 3.827156  | 5.762100  | -1.794170 |
| H | 1.410114  | 5.683590  | -0.220416 |
| H | 2.886313  | 6.582214  | 0.212464  |
| H | 9.741519  | 5.318266  | -0.127642 |
| H | 10.397806 | 7.177134  | -1.620882 |
| H | 8.652775  | 8.544555  | -2.766053 |
| H | 6.239550  | 8.056669  | -2.364549 |
| H | 5.587324  | 6.210871  | -0.815935 |
| H | 8.336070  | 3.358376  | -1.717284 |
| H | 9.915871  | 1.515128  | -2.222765 |



Supplementary Material (ESI) for Chemical Communications  
This journal is (c) The Royal Society of Chemistry 2007

|   |           |           |           |
|---|-----------|-----------|-----------|
| H | 10.729181 | 0.023016  | -0.397988 |
| H | 9.943330  | 0.396016  | 1.946820  |
| H | 8.410484  | 2.252458  | 2.464053  |
| H | 8.987492  | 5.037110  | 2.437455  |
| H | 7.453007  | 6.010818  | 4.198698  |
| H | 2.815178  | 6.985516  | 3.409551  |
| H | 2.160986  | 9.319894  | 2.900434  |
| H | 3.799451  | 10.883359 | 1.850216  |
| H | 6.096773  | 10.075704 | 1.301256  |
| H | 6.746458  | 7.738925  | 1.787871  |
| H | 3.568253  | 3.314938  | 4.175103  |
| H | 2.666443  | 2.985543  | 6.454026  |
| H | 3.133140  | 4.667167  | 8.241645  |
| H | 4.517264  | 6.676246  | 7.719267  |
| H | 5.401942  | 7.016504  | 5.433293  |

2-AlBr<sub>3</sub> adduct ( $\mu$ -CO isomer)

|   |          |          |          |
|---|----------|----------|----------|
| C | 4.823647 | 6.143623 | 5.683021 |
| C | 4.556228 | 5.201060 | 4.674473 |
| C | 3.783145 | 4.075299 | 4.976811 |
| C | 3.282130 | 3.887705 | 6.268992 |
| C | 3.554094 | 4.824047 | 7.268146 |
| C | 4.327277 | 5.952939 | 6.973663 |
| P | 5.266587 | 5.443554 | 2.971174 |
| C | 4.826125 | 7.236513 | 2.669452 |
| C | 3.546009 | 7.712987 | 3.003133 |
| C | 3.184436 | 9.032281 | 2.718107 |
| C | 4.095756 | 9.895952 | 2.100298 |
| C | 5.371641 | 9.430142 | 1.769104 |

Supplementary Material (ESI) for Chemical Communications  
This journal is (c) The Royal Society of Chemistry 2007

|    |           |           |           |
|----|-----------|-----------|-----------|
| C  | 5.734052  | 8.107997  | 2.046437  |
| Fe | 4.916572  | 4.012656  | 1.320168  |
| P  | 7.065919  | 4.361138  | 0.831773  |
| C  | 7.880253  | 5.053893  | 2.347896  |
| C  | 7.080047  | 5.559338  | 3.289543  |
| Fe | 2.964102  | 2.392082  | 0.645657  |
| S  | 2.671048  | 4.478910  | 1.570436  |
| C  | 1.987647  | 5.690484  | 0.331724  |
| C  | 3.404436  | 4.985052  | -1.668584 |
| C  | 2.966594  | 6.114696  | -0.747731 |
| H  | 3.841343  | 6.572996  | -0.258826 |
| H  | 2.495311  | 6.902715  | -1.363589 |
| S  | 4.310119  | 3.561444  | -0.869587 |
| P  | 0.970228  | 2.134245  | -0.344466 |
| C  | 0.778968  | 0.338378  | -0.749838 |
| C  | 1.868521  | -0.432122 | -0.696417 |
| P  | 3.488199  | 0.331198  | -0.207974 |
| C  | 4.155679  | -1.121505 | 0.762730  |
| C  | 5.226452  | -1.904739 | 0.305566  |
| C  | 5.603552  | -3.057642 | 0.999706  |
| C  | 4.919552  | -3.442394 | 2.154032  |
| C  | 3.857081  | -2.663784 | 2.618496  |
| C  | 3.477302  | -1.509452 | 1.930849  |
| C  | -0.613371 | 2.447349  | 0.598203  |
| C  | -1.841237 | 1.972152  | 0.099548  |
| C  | -3.024948 | 2.182095  | 0.809105  |
| C  | -3.001138 | 2.874414  | 2.025098  |
| C  | -1.788989 | 3.355260  | 2.522916  |
| C  | -0.600062 | 3.140662  | 1.816330  |
| C  | 0.552673  | 2.889617  | -2.006159 |
| C  | -0.389449 | 3.922642  | -2.142475 |

Supplementary Material (ESI) for Chemical Communications  
This journal is (c) The Royal Society of Chemistry 2007

|    |           |           |           |
|----|-----------|-----------|-----------|
| C  | -0.620989 | 4.511231  | -3.390131 |
| C  | 0.081496  | 4.074019  | -4.516600 |
| C  | 1.021824  | 3.045926  | -4.388706 |
| C  | 1.260608  | 2.461680  | -3.142663 |
| C  | 2.347965  | 1.680962  | 2.122887  |
| O  | 1.903670  | 1.270603  | 3.123864  |
| C  | 5.100527  | 2.530920  | 2.127618  |
| O  | 5.461006  | 1.570307  | 2.813913  |
| Al | 6.188237  | 0.791222  | 4.375153  |
| Br | 7.459238  | 2.440286  | 5.404181  |
| C  | 4.436538  | 0.198644  | -1.804460 |
| C  | 3.857537  | -0.338250 | -2.965804 |
| C  | 4.592971  | -0.434486 | -4.151586 |
| C  | 5.920013  | -0.000113 | -4.188708 |
| C  | 6.502819  | 0.535829  | -3.036768 |
| C  | 5.767062  | 0.644883  | -1.854090 |
| C  | 8.227125  | 2.966565  | 0.412084  |
| C  | 8.629169  | 2.716633  | -0.910855 |
| C  | 9.530659  | 1.684909  | -1.189203 |
| C  | 10.025283 | 0.881714  | -0.156231 |
| C  | 9.613751  | 1.113707  | 1.158828  |
| C  | 8.719947  | 2.150388  | 1.442916  |
| C  | 7.656799  | 5.653528  | -0.397502 |
| C  | 9.031050  | 5.913757  | -0.554098 |
| C  | 9.467025  | 6.933424  | -1.402548 |
| C  | 8.538385  | 7.705770  | -2.110345 |
| C  | 7.173098  | 7.452654  | -1.961103 |
| C  | 6.737965  | 6.434650  | -1.104967 |
| Br | 4.397316  | 0.093993  | 5.659534  |
| Br | 7.524009  | -0.952437 | 3.650784  |
| H  | 0.341871  | 3.518418  | 2.216143  |

Supplementary Material (ESI) for Chemical Communications  
This journal is (c) The Royal Society of Chemistry 2007

|   |           |           |           |
|---|-----------|-----------|-----------|
| H | -1.759555 | 3.894412  | 3.471170  |
| H | -3.926470 | 3.036895  | 2.580462  |
| H | -3.968631 | 1.804621  | 0.411104  |
| H | -1.883016 | 1.448352  | -0.857034 |
| H | 2.015225  | 1.678520  | -3.054407 |
| H | 1.578799  | 2.699767  | -5.261037 |
| H | -0.102576 | 4.531902  | -5.489779 |
| H | -1.356666 | 5.312565  | -3.479703 |
| H | -0.957326 | 4.262913  | -1.275356 |
| H | -0.201655 | -0.056705 | -1.027344 |
| H | 1.836487  | -1.505053 | -0.906876 |
| H | 6.238967  | 1.072619  | -0.968243 |
| H | 7.537988  | 0.877092  | -3.051136 |
| H | 6.498902  | -0.080511 | -5.110489 |
| H | 4.127106  | -0.858796 | -5.043232 |
| H | 2.826528  | -0.692712 | -2.952030 |
| H | 2.646166  | -0.919640 | 2.315314  |
| H | 3.328050  | -2.941357 | 3.531150  |
| H | 5.222430  | -4.337388 | 2.699679  |
| H | 6.444478  | -3.650864 | 0.636348  |
| H | 5.767911  | -1.625285 | -0.597626 |
| H | 2.544562  | 4.557000  | -2.198977 |
| H | 4.107399  | 5.359961  | -2.426768 |
| H | 1.080902  | 5.241996  | -0.097776 |
| H | 1.687420  | 6.557083  | 0.937101  |
| H | 9.768099  | 5.309289  | -0.022653 |
| H | 10.536247 | 7.123927  | -1.513205 |
| H | 8.880558  | 8.501193  | -2.774906 |
| H | 6.440699  | 8.049274  | -2.508302 |
| H | 5.674734  | 6.242803  | -0.974563 |
| H | 8.258733  | 3.344768  | -1.721950 |

Supplementary Material (ESI) for Chemical Communications  
This journal is (c) The Royal Society of Chemistry 2007

|   |           |           |           |
|---|-----------|-----------|-----------|
| H | 9.857757  | 1.515158  | -2.217309 |
| H | 10.730759 | 0.078647  | -0.376373 |
| H | 9.976913  | 0.485831  | 1.972852  |
| H | 8.420685  | 2.326992  | 2.478865  |
| H | 8.971065  | 5.069246  | 2.424164  |
| H | 7.454113  | 6.021630  | 4.206417  |
| H | 2.834828  | 7.051175  | 3.500669  |
| H | 2.188924  | 9.389214  | 2.989175  |
| H | 3.814224  | 10.927981 | 1.884632  |
| H | 6.093268  | 10.097226 | 1.293944  |
| H | 6.731632  | 7.756939  | 1.779759  |
| H | 3.573006  | 3.336442  | 4.204040  |
| H | 2.695788  | 2.995384  | 6.489878  |
| H | 3.170415  | 4.673395  | 8.278757  |
| H | 4.546622  | 6.686682  | 7.751565  |
| H | 5.411610  | 7.036325  | 5.460314  |

#### IV. X-ray Crystallography

Crystals were mounted using Paratone-N oil (Exxon) to a thin glass fiber. Data, collected at 198 K on a Siemens CCD diffractometer, were filtered to remove statistical outliers. The integration software (SAINT) was used to test for crystal decay as a bi-linear function of X-ray exposure time and  $\sin(\Theta)$ . The data were solved using SHELXTL by Direct Methods; atomic positions were deduced from an E map or by an unweighted difference Fourier synthesis. H atom  $U^s$  were assigned as  $1.2U_{eq}$  for adjacent C atoms. Non-H atoms were refined anisotropically. Successful convergence of the full-matrix least-squares refinement of  $F^2$  was indicated by the maximum shift/error for the final cycle. Crystallographic data is listed in Table 1S.

**Table 1S.** Details of data collection and structure refinement for **1**.

|                                                  |                             |
|--------------------------------------------------|-----------------------------|
| Compound                                         | <b>1</b>                    |
| Chemical formula                                 | $C_{56}H_{48}Fe_2O_2P_4S_2$ |
| Temperature (K)                                  | 193(2)                      |
| Crystal size ( $mm^3$ )                          | 0.36 x 0.09 x 0.03          |
| Crystal system                                   | Monoclinic                  |
| Space group                                      | $P2_1/n$                    |
| a (Å)                                            | 10.9417(7)                  |
| b (Å)                                            | 17.3546(10)                 |
| c (Å)                                            | 26.1713(15)                 |
| $\alpha$ (°)                                     | 90.0                        |
| $\beta$ (°)                                      | 97.901 (2)                  |
| $\gamma$ (°)                                     | 90.0                        |
| V (Å <sup>3</sup> )                              | 4922.5 (5)                  |
| Z                                                | 4                           |
| Density calcd ( $Mg\ m^{-3}$ )                   | 1.420                       |
| $\mu$ (Mo $K_{\alpha}$ , $mm^{-1}$ )             | 0.71073                     |
| max./min. trans'n                                | 0.9750/0.7444               |
| reflections meas'd/Indep.                        | 21096/20391                 |
| data/restraints/parameters                       | 20391/0/598                 |
| GOF on $F^2$                                     | 0.808                       |
| $R_{int}$                                        | 0.00 <sup>c</sup>           |
| $R_1$ [ $I > 2\sigma$ ] (all data) <sup>a</sup>  | 0.0374 (0.0797)             |
| $WR_2$ [ $I > 2\sigma$ ] (all data) <sup>b</sup> | 0.0506 (0.0569)             |
| max. peak/hole ( $e^{-}/\text{Å}^3$ )            | 0.463/-0.433                |

$$^a R_1 = \Sigma |F_o| - |F_c| / \Sigma |F_o|$$

$$^b wR_2 = \{ [w(|F_o| - |F_c|)^2] / \Sigma [wF_o^2] \}^{1/2}, \text{ where } w = 1/\sigma^2(F_o)$$
